# Supplementary material
Source: Springer Nature journal article supplement (https://www.springermedizin.de/resource/supplementary/12891_2014_2440_MOESM1_ESM.pdf/9509572)
Supplement: MOESM1 [file 9509572]

| Time Line                                        | Recruitment Procedures                                                                                                                                                                                                                                              | Data Collection                                                                                                                                                                             |
|--------------------------------------------------|---------------------------------------------------------------------------------------------------------------------------------------------------------------------------------------------------------------------------------------------------------------------|---------------------------------------------------------------------------------------------------------------------------------------------------------------------------------------------|
| Patient Identification                           | <ul style="list-style-type: none"> <li>•Direct referral within centre or between centres</li> </ul>                                                                                                                                                                 | <ul style="list-style-type: none"> <li>•None</li> </ul>                                                                                                                                     |
| Screening/<br>Eligibility<br>Assessment          | <ul style="list-style-type: none"> <li>•Study explanation</li> <li>•History-review, eligibility criteria, and other relevant medical conditions documented</li> <li>•Physical Examination</li> <li>•Radiographs</li> <li>•Informed Consent (if eligible)</li> </ul> | <ul style="list-style-type: none"> <li>•Screening Form</li> <li>•Informed Consent</li> <li>•Patient Contact Form</li> <li>•Baseline Form</li> <li>•Fracture Characteristics Form</li> </ul> |
| Randomization                                    | <ul style="list-style-type: none"> <li>•24-hour Internet randomization procedure</li> <li>•Eligibility criteria reviewed again</li> <li>•Key patient information recorded at Methods Centre</li> <li>•Allocation issued to patient</li> </ul>                       | <ul style="list-style-type: none"> <li>•Randomization Form at the Methods Centre</li> </ul>                                                                                                 |
| Surgery                                          | <ul style="list-style-type: none"> <li>•Either the Multiple Screws or Sliding Hip Screw surgical protocols followed</li> </ul>                                                                                                                                      | <ul style="list-style-type: none"> <li>•Surgical Report Form</li> <li>•AE Form</li> </ul>                                                                                                   |
| Peri-operative Care within 48 hours post surgery | <ul style="list-style-type: none"> <li>•Standardization of key aspect of peri-operative care</li> <li>•Radiographs</li> </ul>                                                                                                                                       | <ul style="list-style-type: none"> <li>•Peri-Op Form</li> <li>•Post-Op Care Form</li> <li>•RS, AE Forms</li> </ul>                                                                          |
